# Supplementary material for: Hair Loss Profiles and Ritlecitinib Efficacy in Patients with Alopecia Areata: Post Hoc Analysis of the ALLEGRO Phase 2b/3 Study
Source: Springer Nature journal article supplement (doi:10.1007/s13555-023-00997-x), 2023-09-14
Supplement: MOESM1 [file 26042560]

## **SUPPLEMENTARY MATERIAL**

### **Hair loss profiles and ritlecitinib efficacy in patients with alopecia areata: post hoc analysis of the ALLEGRO phase 2b/3 study**

Diamant Thaçi<sup>1</sup>, Christos Tziotzios<sup>2</sup>, Taisuke Ito<sup>3</sup>, Justin Ko<sup>4</sup>, Ayşe Serap Karadağ<sup>5</sup>, Hong Fang<sup>6</sup>, Roger A. Edwards<sup>7</sup>, Gianluca Bonfanti,<sup>8</sup> Robert Wolk<sup>9</sup>, Helen Tran,<sup>10</sup> Ernest Law<sup>10</sup>

<sup>1</sup>Institut and Comprehensive Center for Inflammation Medicine, University of Luebeck, Luebeck, Germany; <sup>2</sup>St John's Institute of Dermatology, King's College London, London, UK; <sup>3</sup>Department of Dermatology, Hamamatsu University School of Medicine, Hamamatsu, Japan; <sup>4</sup>Department of Dermatology, Stanford University School of Medicine, Stanford, CA, USA; <sup>5</sup>Department of Dermatology, Istanbul Arel University, School of Medicine, Memorial Health Group, Istanbul, Turkey; <sup>6</sup>Department of Dermatology, First Affiliated Hospital, College of Medicine, Zhejiang University, Hangzhou City, China; <sup>7</sup>Health Services Consulting Corporation, Boxborough, MA, USA; <sup>8</sup>Engineering Ingegneria Informatica, SPA, Milan, Italy; <sup>9</sup>Pfizer Inc, Groton, CT, USA; <sup>10</sup>Pfizer Inc, New York, NY, USA

**Corresponding author:** Ernest Law

**Email:** [ernest.law@pfizer.com](mailto:ernest.law@pfizer.com)

**Supplemental Figure 1.** Distribution of indicator variables within the classes identified by latent class analysis for the A) 3-class, B) 4-class, and C) 5-class models

Supplemental Figure 1

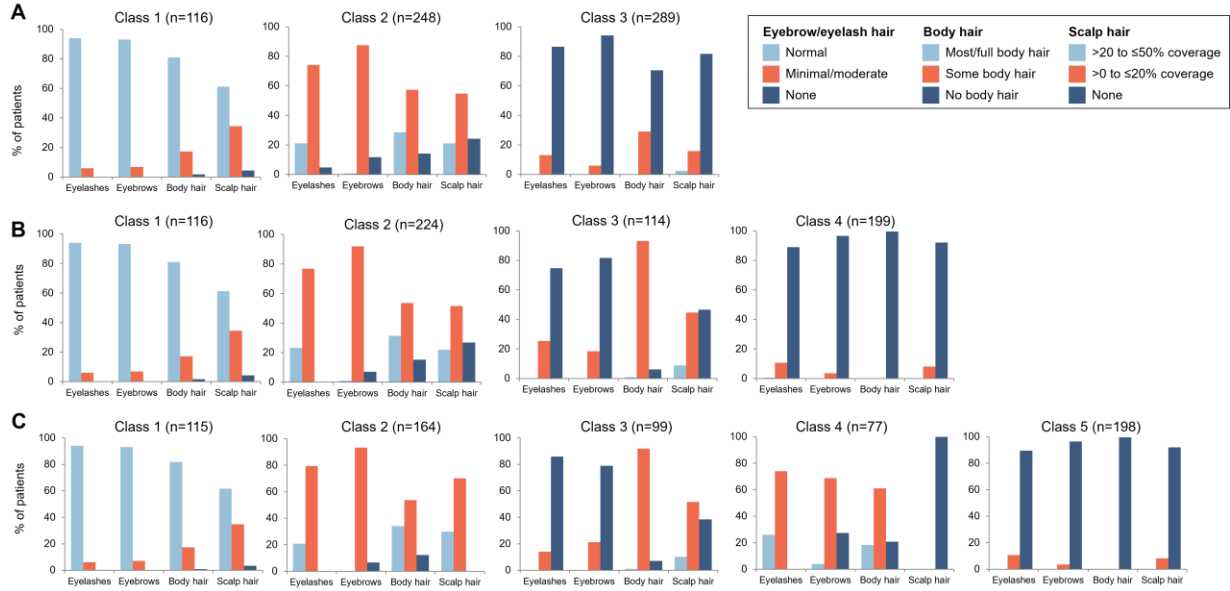

**Supplementary Table 1.** List of participating Institutional Review Boards (IRBs) or Ethics Committees (ECs)

| Study Site Number                              | Independent EC or IRB                                                                                                                                                                                                          |
|------------------------------------------------|--------------------------------------------------------------------------------------------------------------------------------------------------------------------------------------------------------------------------------|
| <b>Argentina</b>                               |                                                                                                                                                                                                                                |
| 1046                                           | Centro de Investigaciones Metabolicas Comite de Etica en Investigacion<br>Pres. J. E. Uriburu 754, 3rd Floor, office 12<br>CABA, BUENOS AIRES C1027AAP                                                                         |
| 1047                                           | Comite Independiente de Etica para Ensayos en Farmacologia Clinica<br>Fundacion de Estudios Farmacologicos y de Medicamentos "Prof.Luis M. Zieher"<br>J.E. Uriburu 774 1st Floor<br>CABA, C1280AEB                             |
| <b>Australia</b>                               |                                                                                                                                                                                                                                |
| 1028, 1029, 1030, 1031, 1079, 1104             | Bellberry Limited Human Research Ethics Committee<br>123 Glen Osmond Road<br>Eastwood, South Australia 5063                                                                                                                    |
| 1139                                           | Monash Health Human Research Ethics Committee<br>246 Clayton Road, Monash Medical Centre<br>Clayton, VIC 3168                                                                                                                  |
| <b>Canada</b>                                  |                                                                                                                                                                                                                                |
| 1011, 1012, 1032, 1035, 1039, 1041, 1045, 1100 | Western Institutional Review Board, Canada<br>601 West Broadway, Suite 400<br>Vancouver, BC V5Z 4C2                                                                                                                            |
| 1027                                           | University of Manitoba (BREB) Research Ethics - Bannatyne<br>P126 - 770 Bannatyne Avenue<br>Winnipeg, MB R3E 0W3                                                                                                               |
| 1042                                           | Nova Scotia Health Authority Research Ethics Board<br>Centre for Clinical Research<br>5790 University Ave, Room 118<br>Halifax, NS B3H 1V7                                                                                     |
| <b>Chile</b>                                   |                                                                                                                                                                                                                                |
| 1050, 1052, 1111                               | Comite Etico Cientifico Servicio de Salud Metropolitano Norte<br>Calle San Jose 1053, Independencia<br>Santiago, REGION METROPOLITANA 8380755                                                                                  |
| 1051                                           | Comite Etico Cientifico Hospital Dr. Gustavo Fricke Servicio de Salud Vina del Mar - Quillota<br>Calle Limache 1307 Esquina Peñablanca 2° piso<br>Vina del Mar, VALPARAISO 2520563                                             |
| <b>China</b>                                   |                                                                                                                                                                                                                                |
| 1053                                           | Medical Ethics Committee of The University of Hong Kong-Shenzhen Hospital<br>No.1, Haiyuan Road, Futian District<br>Shenzhen, GUANGDONG 518053                                                                                 |
| 1054                                           | The First Affiliated Hospital With Nanjing Medical University Ethics Committee<br>No. 300 Guangzhou Road<br>Nanjing, JIANGSU 210029                                                                                            |
| 1055                                           | Peking University First Hospital Biological and Medical Research Ethics Committee<br>No.6, Dahongluochang Street, Xicheng District<br>Beijing, BEIJING 100034                                                                  |
| 1087                                           | Huashan Hospital Fudan University Ethics Committee<br>No.12 Wulumuqi Zhong Road<br>Shanghai, SHANGHAI 200040                                                                                                                   |
| 1089                                           | EC on Clinical drugs, Equipment and New Medical Technologies of<br>The First Affiliated Hospital, Sun Yat-sen University<br>Room 110, 1st floor, Dragon Pearl Building, No.5 ZhuSigang 2nd Road<br>Guangzhou, GUANGDONG 510080 |
| 1090                                           | EC of The Second Affiliated Hospital of Zhejiang University School of Medicine<br>No. 88 Jiefang Road<br>Hangzhou, ZHEJIANG 310009                                                                                             |
| 1170                                           | Peking University Third Hospital Medical Science Research Ethics Committee<br>No. 49 North Huayuan Road, Haidian District<br>Beijing, BEIJING 100191                                                                           |
| 1177                                           | Huazhong University of Science and Technology Clinical Trial Ethics Committee<br>No. 13 Hangkong Road<br>Wuhan, HUBEI 430030                                                                                                   |
| 1186                                           | Ethics Committee of Ruijin Hospital Affiliated to Shanghai Jiaotong University School of Medicine<br>No.197 Ruijin Er Road<br>Shanghai, 200025                                                                                 |

|                                       |                                                                                                                                                                         |
|---------------------------------------|-------------------------------------------------------------------------------------------------------------------------------------------------------------------------|
| 1187                                  | Ethics Committee of Beijing Friendship Hospital, Capital Medical University<br>Yong An Road, Xicheng District, No. 95<br>Beijing, 100050                                |
| 1188                                  | EC of The First Affiliated Hospital of College of Medicine, Zhejiang University<br>No.79 Qingchun Road<br>Hangzhou, ZHEJIANG 310003                                     |
| <b>Colombia</b>                       |                                                                                                                                                                         |
| 1056                                  | Comite de Etica de la Investigacion de Riesgo de Fractura S.A.<br>Carrera 20B No. 74 - 46<br>Bogota, D.C.                                                               |
| 1059                                  | Comite de Etica para la Investigacion Clinica CEIC<br>de la Fundacion Centro de Investigacion Clinica CIC<br>Carrera 43 A # 7-50A Of. 309<br>Medellin, ANTIOQUIA 050001 |
| 1073                                  | Comite de etica de la investigacion de la Fundacion Hospitalaria San Vicente de Paul<br>Calle 64 # 51d-154 bloque 11<br>Medellin, ANTIOQUIA 050010                      |
| <b>Czech Republic</b>                 |                                                                                                                                                                         |
| 1060, 1071, 1080, 1137, 1153,<br>1165 | Eticka komise pro multicentricka klinicka hodnoceni<br>Fakultni nemocnice Kralovske Vinohrady<br>Srobarova 50<br>Praha 10, 100 34                                       |
| 1071                                  | Eticka komise pri NZZ CLINTRIAL s.r.o<br>Pocernicka 1427/16<br>Praha 10, 100 00                                                                                         |
| 1080                                  | Eticka komise Nemocnice Na Bulovce<br>Budinova 2<br>Praha 8, 180 81                                                                                                     |
| 1137                                  | Eticka komise Fakultni nemocnice Hradec Kralove<br>Sokolska 581<br>Hradec Kralove, 500 05                                                                               |
| 1153                                  | Eticka komise Fakultni nemocnice Olomouc a Lekai'ske fakulty UP v Olomouci<br>I.P. Pavlova 185/6<br>Olomouc, 779 00                                                     |
| 1165                                  | Eticka komise Fakultni nemocnice u sv. Anny v Brne<br>Pekarska 53<br>Brno, 656 91                                                                                       |
| <b>Germany</b>                        |                                                                                                                                                                         |
| 1064, 1066, 1096, 1143, 1154,<br>1160 | Ethikkommission der Universitaet zu Luebeck<br>Haus 2, Ratzeburger Allee 160<br>Luebeck, 23562                                                                          |
| <b>Hungary</b>                        |                                                                                                                                                                         |
| 1144, 1145, 1146, 1152                | Egeszsegugyi Tudomanyos Tanacs<br>Klinikai Farmakologiai Etikai Bizottsaga<br>Szechenyi Istvan ter 7-8<br>Budapest, 1051                                                |
| <b>Japan</b>                          |                                                                                                                                                                         |
| 1091                                  | Tokyo Medical University Hospital IRB<br>6-7-1, Nishishinjuku<br>Shinjuku-ku, TOKYO 160-0023                                                                            |
| 1092                                  | Juntendo Tokyo Koto Geriatric Medical Center Institutional Review Board<br>3-3-20, Shinsuna<br>Koto-ku, TOKYO 136-0075                                                  |
| 1094                                  | Hamamatsu University Hospital, Institutional Review Board<br>1-20-1 Handayama, Higashi-ku<br>Hamamatsu, SHIZUOKA 431-3192                                               |
| 1117                                  | Nagoya City University Hospital Medical Research Institutional Review Board<br>Kawasumi 1, Mizuho-cho, Mizuho-ku<br>Nagoya, AICHI 467-8602                              |
| 1169                                  | Osaka City University Hospital Institutional Review Board<br>1-5-7 Asahi-machi, Abeno-ku<br>Osaka, OSAKA 545-8586                                                       |
| 1183                                  | Tohoku University Hospital Institutional Review Board<br>1-1 Seiry-cho, Aoba-ku<br>Sendai, MIYAGI 980-8574                                                              |
| <b>Republic of Korea</b>              |                                                                                                                                                                         |
| 1120                                  | Pusan National University Hospital Institutional Review Board<br>187, Gudeok-ro, Seo-gu, 3F, S Building                                                                 |

|                                          |                                                                                                                                                                                         |
|------------------------------------------|-----------------------------------------------------------------------------------------------------------------------------------------------------------------------------------------|
|                                          | Busan, 49241                                                                                                                                                                            |
| 1123                                     | Seoul National University Hospital Institutional Review Board<br>101 Daehak-ro, Jongno-gu<br>Seoul, 03080                                                                               |
| 1140                                     | The Catholic University of Korea, Eunpyeong St. Mary's Hospital Institutional Review Board<br>1021, Tongil-ro, Eunpyeong-gu<br>Seoul, 03312                                             |
| <b>Mexico</b>                            |                                                                                                                                                                                         |
| 1182                                     | Comité de Ética en Investigación de Sociedad Administradora de Salud S.C.<br>Calle Nicolas Bravo N°50 Col. Chapultepec Norte<br>Morelia, MICHOACAN C.P.58260                            |
| <b>Poland</b>                            |                                                                                                                                                                                         |
| 1098, 1102, 1106, 1107, 1108, 1109       | Komisja Bioetyczna przy Okregowej Izbie Lekarskiej w Lodzi<br>ul. Czerwona 3<br>Lodz, 93-005                                                                                            |
| <b>Russian Federation</b>                |                                                                                                                                                                                         |
| 1068                                     | Independent Ethics Committee of SPb SBHI Dermatovenerologic Dispensary<br>No 10 - Clinic of Dermatology and Venereology<br>29, lit. A, Parkhomenko prospekt<br>Saint Petersburg, 194021 |
| 1069                                     | Local Independent Ethics Committee of FSBEI HE Rostov State Medical University MoH RF<br>29, Nakhichevansky per.<br>Rostov-on-Don, 344022                                               |
| 1070, 1116                               | Independent Ethics Committee of "Pierre Volkenshtein Skin Diseases Clinic" LLC<br>24, lit. A, premises 1H., Ryleeva str.,<br>Saint Petersburg, 191123                                   |
| 1115                                     | Local Ethics Committee of SBHI Chelyabinsk Regional Clinical Dermatovenerologic Dispensary<br>24, Yablochkina str.,<br>Chelyabinsk, 454048                                              |
| 1136                                     | Ethics Committee of SAHI YR Clinical Emergency Hospital n.a.N.V Solovyev<br>11 Zagorodny Sad str<br>Yaroslavl, 150003                                                                   |
| 1155                                     | Interuniversity Ethics Committee<br>Delegatskaya str., 20, bld. 1<br>Moscow, 127473                                                                                                     |
| 1156                                     | Local Independent Ethics Committee of FSAI NMRCC MoH RF<br>2, bld 1, Lomonosovsky pr.<br>Moscow, 119991                                                                                 |
| 1162                                     | Local Ethics Committee of FSBEI HE Kirov SMU MOH Russia<br>163, Moskovskaya str<br>Kirov, 610048                                                                                        |
| <b>Spain</b>                             |                                                                                                                                                                                         |
| 1112, 1113, 1114, 1119, 1121, 1129, 1130 | CEIm Hospital Universitari Germans Trias i Pujol<br>Ctra de Canyet s/n<br>Badalona, BARCELONA 08916                                                                                     |
| <b>Taiwan</b>                            |                                                                                                                                                                                         |
| 1074, 1075, 1076, 1077, 1081, 1082       | Taipei Medical University Joint Institutional Review Board<br>17F., No.172-1, Sec. 2, Keelung Rd. Daan Dist.<br>Taipei City, 10675                                                      |
| 1074                                     | Chung Shan Medical University Hospital Institutional Review Board<br>No.110, Sec. 1, Chien-Kuo North Road<br>Taichung, 40201                                                            |
| 1075                                     | Chang Gung Medical Foundation Institutional Review Board<br>No. 199, Tung Hwa North Road<br>Taipei, 10507                                                                               |
| 1077, 1081                               | National Taiwan University Hospital Research Ethics Committee<br>No. 7, Chung-Shan South Road, R.O.C.<br>Taipei, 100                                                                    |
| 1082                                     | Kaohsiung Medical University Chung-Ho Memorial Hospital Institutional Review Board<br>No. 100, Tzyou 1st Road<br>Kaohsiung, 807                                                         |
| <b>United Kingdom</b>                    |                                                                                                                                                                                         |
| 1134, 1135, 1138, 1147, 1175             | Yorkshire & The Humber - Sheffield Research Ethics Committee<br>NHSBT Newcastle Blood Donor Centre<br>Holland Drive                                                                     |

|                                                                                    |                                                                                                                                      |
|------------------------------------------------------------------------------------|--------------------------------------------------------------------------------------------------------------------------------------|
|                                                                                    | Newcastle upon Tyne, NE2 4NQ                                                                                                         |
| <b>United States</b>                                                               |                                                                                                                                      |
| 1001, 1006, 1010, 1013, 1014, 1015, 1024, 1085, 1099                               | WESTERN INSTITUTIONAL REVIEW BOARD<br>1019 39th Ave SE, Ste 120<br>Puyallup, WA 98374-2115                                           |
| 1002, 1003, 1004, 1005, 1007, 1008, 1026, 1037, 1038, 1084, 1095, 1097, 1133, 1157 | Copernicus Group Independent Review Board<br>5000 CentreGreen Way, Ste 200<br>Cary, NORTH CAROLINA 27513                             |
| 1009                                                                               | Human Research Protection Program, University of Minnesota<br>200 Oak St SE, Ste 350-2<br>Minneapolis, MN 55455                      |
| 1017                                                                               | Kaiser Permanente Northern California Institutional Review Board<br>1800 Harrison St., 10th Fl<br>Oakland, CA 94612                  |
| 1022                                                                               | University of California, San Francisco, Human Research Protection Program<br>3333 California St, Ste 315<br>San Francisco, CA 94118 |
| 1078                                                                               | Northwestern University Institutional Review Board<br>750 N Lake Shore Dr, Ste 700<br>Chicago, ILLINOIS 60611                        |
| 1131                                                                               | NYU School of Medicine Institutional Review Board<br>1 Park Ave, 6th Fl<br>New York, NY 10016                                        |
| 1132                                                                               | University of Iowa IRB, Human Subject Office<br>600 Newton Rd, 105 Hardin Library for the Health Sciences<br>Iowa City, IA 52242     |
| 1142                                                                               | Cleveland Clinic IRB<br>9500 Euclid Ave, OS-1<br>Cleveland, OH 44195                                                                 |
| 1149                                                                               | Springfield Committee for Research Involving Human Subjects<br>201 E. Madison St<br>Springfield, ILLINOIS 62702                      |

**Supplementary Table 2.** Clinician- and Patient-Reported Outcome Measures, Description, and Response Scale/Scoring

| Outcome Measure                                                                                                                                           | Response Scale/Scoring/Questionnaire                                                                                                                                                                                                                                                                                                                                                                                                                                                                                                                                                                                                                                                                                                                                                                                                                 |
|-----------------------------------------------------------------------------------------------------------------------------------------------------------|------------------------------------------------------------------------------------------------------------------------------------------------------------------------------------------------------------------------------------------------------------------------------------------------------------------------------------------------------------------------------------------------------------------------------------------------------------------------------------------------------------------------------------------------------------------------------------------------------------------------------------------------------------------------------------------------------------------------------------------------------------------------------------------------------------------------------------------------------|
| <b>Severity of Alopecia Tool (SALT)</b>                                                                                                                   |                                                                                                                                                                                                                                                                                                                                                                                                                                                                                                                                                                                                                                                                                                                                                                                                                                                      |
| <ul style="list-style-type: none"> <li>▪ Clinician assessment of the amount of scalp hair loss [1]</li> </ul>                                             | <ul style="list-style-type: none"> <li>▪ 0 (no scalp hair loss) to 100 (complete scalp hair loss)</li> </ul>                                                                                                                                                                                                                                                                                                                                                                                                                                                                                                                                                                                                                                                                                                                                         |
| <b>Eyebrow Assessment (EBA)</b>                                                                                                                           |                                                                                                                                                                                                                                                                                                                                                                                                                                                                                                                                                                                                                                                                                                                                                                                                                                                      |
| <ul style="list-style-type: none"> <li>▪ Patients with EBA scores of 0-3 at baseline were included in the EBA assessments throughout the study</li> </ul> | <ul style="list-style-type: none"> <li>▪ 0 = <b>None</b> (no eyebrow hair)</li> <li>▪ 1 = <b>Minimal</b> eyebrow (normal or decreased density of 1 or both eyebrows with large gap[s] <b>or</b> severely decreased density of 1 or both eyebrows with or without gap[s])</li> <li>▪ 2 = <b>Moderate</b> eyebrow (normal density of both eyebrows with short gap[s] that does not significantly distort the appearance of the eyebrows <b>or</b> mildly decreased density of eyebrows with or without short gap[s] <b>or</b> moderately decreased density of eyebrows without short gaps[s]. There is a visual definition of eyebrows at a distance of 3 feet)</li> <li>▪ 3 = <b>Normal</b> eyebrow (normal density of both right and left eyebrows spanning usual length (ie, from glabella to near temple) and width. There are no gaps)</li> </ul> |
| <b>Eyelash Assessment (ELA)</b>                                                                                                                           |                                                                                                                                                                                                                                                                                                                                                                                                                                                                                                                                                                                                                                                                                                                                                                                                                                                      |
| <ul style="list-style-type: none"> <li>▪ Patients with ELA scores of 0-3 at baseline were included in the ELA assessments throughout the study</li> </ul> | <ul style="list-style-type: none"> <li>▪ 0 = <b>None</b> (no eyelash hair)</li> <li>▪ 1 = <b>Minimal</b> eyelash (modestly or severely decreased density of and/or large gap[s] in 1 or both upper eyelashes)</li> <li>▪ 2 = <b>Moderate</b> eyelash (normal density of both upper eyelashes without gap[s] and decreased density or</li> </ul>                                                                                                                                                                                                                                                                                                                                                                                                                                                                                                      |

| Outcome Measure                                                                                                                                                                                                                                                                                                                                                                                                                                                                                                                                                                                                                                                                                                                                                                                                            | Response Scale/Scoring/Questionnaire                                                                                                                                                                                                                                                                                                                                                                                                                                                                                                                                                                                                                                                          |
|----------------------------------------------------------------------------------------------------------------------------------------------------------------------------------------------------------------------------------------------------------------------------------------------------------------------------------------------------------------------------------------------------------------------------------------------------------------------------------------------------------------------------------------------------------------------------------------------------------------------------------------------------------------------------------------------------------------------------------------------------------------------------------------------------------------------------|-----------------------------------------------------------------------------------------------------------------------------------------------------------------------------------------------------------------------------------------------------------------------------------------------------------------------------------------------------------------------------------------------------------------------------------------------------------------------------------------------------------------------------------------------------------------------------------------------------------------------------------------------------------------------------------------------|
|                                                                                                                                                                                                                                                                                                                                                                                                                                                                                                                                                                                                                                                                                                                                                                                                                            | <p>gap[s] is present in one or both lower eyelashes <b>or</b> normal density of both upper eyelashes with short gap[s] <b>or</b> mildly decreased density of one or both upper eyelashes with or without short gap[s])</p> <ul style="list-style-type: none"> <li>▪ 3 = <b>Normal</b> eyelash (normal density of both right and left upper and lower eyelashes from near medial canthus to near lateral canthus without any gap[s])</li> </ul>                                                                                                                                                                                                                                                |
| <b>Alopecia Areata Patient Priority Outcomes (AAPPO)</b>                                                                                                                                                                                                                                                                                                                                                                                                                                                                                                                                                                                                                                                                                                                                                                   |                                                                                                                                                                                                                                                                                                                                                                                                                                                                                                                                                                                                                                                                                               |
| <ul style="list-style-type: none"> <li>▪ The AAPPO assesses AA-related hair loss in different body areas (scalp, eyebrows, eyelashes, and body), emotional symptoms, and activity limitations using 5-point scales <ul style="list-style-type: none"> <li>○ Hair loss on the scalp (item 1)</li> <li>○ Hair loss on the eyebrows (item 2)</li> <li>○ Hair loss on the eyelashes (item 3)</li> <li>○ Hair loss on the body (item 4)</li> <li>○ The Emotional Symptoms domain, computed as the mean of items 5-8 with the requirement that <math>\geq 2</math> items have non-missing responses (range, 0-4 points)</li> <li>○ The Activity Limitations domain, computed as the mean of items 9-11 with the requirement that <math>\geq 2</math> items have non-missing responses (range, 0-4 points)</li> </ul> </li> </ul> | <ul style="list-style-type: none"> <li>▪ The 4 hair loss items use a contemporaneous recall period and a 5-point verbal response scale ranging from 0 (no hair loss) to 4 (complete hair loss)</li> <li>▪ The impact items assess 4 emotional symptoms and 3 activity limitations using a 1-week recall period and 2 different 5-point verbal response scales. The 4 items from the Emotional Symptoms domain use never (0), rarely (1), sometimes (2), often (3), and always (4). The 3 items from the Activity Limitations domain use not at all (0), a little (1), moderately (2), a great deal (3), and completely (4).</li> <li>▪ Negative change scores indicate improvement</li> </ul> |
| <b>Patient Global Impression of Change (PGI-C) (v1.0)</b>                                                                                                                                                                                                                                                                                                                                                                                                                                                                                                                                                                                                                                                                                                                                                                  |                                                                                                                                                                                                                                                                                                                                                                                                                                                                                                                                                                                                                                                                                               |
| <p>PGI-C is a self-reported, single-item scale in which patients rate the improvement or worsening of AA compared with the start of the study, using a scale of 7 responses ranging from “greatly improved” to “greatly worsened”</p>                                                                                                                                                                                                                                                                                                                                                                                                                                                                                                                                                                                      | <ul style="list-style-type: none"> <li>▪ Questionnaire: Since the start of the study, my alopecia areata has: <ul style="list-style-type: none"> <li>○ Greatly improved</li> <li>○ Moderately improved</li> <li>○ Slightly improved</li> <li>○ Not changed</li> <li>○ Slightly worsened</li> <li>○ Moderately worsened</li> <li>○ Greatly worsened</li> </ul> </li> </ul>                                                                                                                                                                                                                                                                                                                     |



| Outcome Measure                                                                                                                                                                                 | Response Scale/Scoring/Questionnaire                                                                                                                                                                                                                                                                                                                                                                                                                                                                                                                                                                                                                                                                                                                                                          |
|-------------------------------------------------------------------------------------------------------------------------------------------------------------------------------------------------|-----------------------------------------------------------------------------------------------------------------------------------------------------------------------------------------------------------------------------------------------------------------------------------------------------------------------------------------------------------------------------------------------------------------------------------------------------------------------------------------------------------------------------------------------------------------------------------------------------------------------------------------------------------------------------------------------------------------------------------------------------------------------------------------------|
| <b>Patient Satisfaction with Hair Growth (P-Sat)</b>                                                                                                                                            |                                                                                                                                                                                                                                                                                                                                                                                                                                                                                                                                                                                                                                                                                                                                                                                               |
| <ul style="list-style-type: none"> <li>▪ P-Sat assesses patient satisfaction with hair regrowth since the start of the study in 3 domains: amount, quality, and overall satisfaction</li> </ul> | <ul style="list-style-type: none"> <li>▪ Questionnaire, for each question below: <ul style="list-style-type: none"> <li>▪ How satisfied are you with the <b>amount</b> of hair that has grown back since the start of the study?</li> <li>▪ How satisfied are you with the <b>quality</b> of the new hair regrowth you have experienced since the start of the study?</li> <li>▪ How satisfied <b>overall</b> are you with the hair that has grown back since the start of the study? <ul style="list-style-type: none"> <li>○ Very satisfied</li> <li>○ Moderately satisfied</li> <li>○ Slightly satisfied</li> <li>○ Neither satisfied nor dissatisfied</li> <li>○ Slightly dissatisfied</li> <li>○ Moderately dissatisfied</li> <li>○ Very dissatisfied</li> </ul> </li> </ul> </li> </ul> |

---

AAPPO, Alopecia Areata Patient Priority Outcomes; EBA, Eyebrow Assessment; ELA, Eyelash Assessment; PGI-C, Patient Global Impression of Change; P-Sat, Patient Satisfaction With Hair Growth.

1. Olsen EA, Hordinsky MK, Price VH, et al. Alopecia areata investigational assessment guidelines—part II. National Alopecia Areata Foundation. *J Am Acad Dermatol.* 2004;51:440-447.

**Supplementary Table 3.** Fit and diagnostic statistics for latent class models from 2 to 9 classes

| <b>Number of classes</b> | <b>LLIK</b> | <b>AIC</b> | <b>BIC</b> | <b>CAIC</b> | <b>SABIC</b> | <b>Relative Entropy</b> | <b>Smallest ALCPP</b> |
|--------------------------|-------------|------------|------------|-------------|--------------|-------------------------|-----------------------|
| 2                        | -2256.650   | 4547.301   | 4623.488   | 4640.488    | 4977.259     | 0.882                   | 0.949                 |
| 3                        | -2126.402   | 4304.805   | 4421.326   | 4447.326    | 4962.388     | 0.869                   | 0.935                 |
| 4                        | -2100.508   | 4271.016   | 4427.871   | 4462.871    | 5156.224     | 0.817                   | 0.811                 |
| 5                        | -2092.241   | 4272.482   | 4469.672   | 4513.672    | 5385.316     | 0.848                   | 0.784                 |
| 6                        | -2088.361   | 4282.721   | 4520.245   | 4573.245    | 5623.179     | 0.847                   | 0.780                 |
| 7                        | -2084.662   | 4293.325   | 4571.183   | 4633.183    | 5861.408     | 0.831                   | 0.623                 |
| 8                        | -2082.958   | 4307.915   | 4626.107   | 4697.107    | 6103.623     | 0.880                   | 0.736                 |
| 9                        | -2081.134   | 4322.268   | 4680.794   | 4760.794    | 6345.601     | 0.839                   | 0.645                 |

AIC, Akaike information criterion; ALCPP, average latent class posterior probability; BIC, Bayesian information criterion; CAIC, consistent AIC; LLIK, log-likelihood; SABIC, sample size-adjusted BIC.
